# Supplementary material for: Cultural Engagement and Incidence of Cognitive Impairment: A 6-year Longitudinal Follow-up of the Japan Gerontological Evaluation Study (JAGES)
Source: PubMed Central journal article supplement (PMC8421199; doi:10.2188/jea.je20190337), 2021-10-05
Supplement: je-31-545-s001.pdf [file je-31-545-s001.pdf]

**eTable 1.** Sequential exclusion of respondents depending on follow-up periods

| Analysis                   | All    |                                                | Male   |                                                | Female |                                                |
|----------------------------|--------|------------------------------------------------|--------|------------------------------------------------|--------|------------------------------------------------|
|                            | n      | Respondents who developed cognitive impairment | n      | Respondents who developed cognitive impairment | n      | Respondents who developed cognitive impairment |
| Overall                    | 46,058 | 4,697                                          | 21,340 | 2,030                                          | 24,718 | 2,667                                          |
| Follow-up periods >1 year  | 44,985 | 4,198                                          | 20,772 | 1,821                                          | 24,213 | 2,377                                          |
| Follow-up periods >2 years | 43,528 | 3,501                                          | 19,996 | 1,503                                          | 23,532 | 1,998                                          |
| Follow-up periods >3 years | 41,934 | 2,690                                          | 19,166 | 1,173                                          | 22,768 | 1,517                                          |
| Follow-up periods >4 years | 40,287 | 1,787                                          | 18,321 | 777                                            | 21,966 | 1,010                                          |
| Follow-up periods >5 years | 38,501 | 794                                            | 17,373 | 323                                            | 21,128 | 471                                            |
| Follow-up periods >6 years | 11,030 | 102                                            | 4,937  | 34                                             | 6,093  | 68                                             |

\*Definition of cognitive impairment: Level 2-7

**eTable 2.** Development of cognitive impairment according to numbers of cultural engagement forms at baseline

| Analysis   | Development of Cognitive Impairment |                  |                 |                  |                   |                  |
|------------|-------------------------------------|------------------|-----------------|------------------|-------------------|------------------|
|            | All (n=44,985)                      |                  | Male (n=20,772) |                  | Female (n=24,213) |                  |
|            | <i>Never</i>                        | <i>Developed</i> | <i>Never</i>    | <i>Developed</i> | <i>Never</i>      | <i>Developed</i> |
|            | n                                   |                  |                 |                  |                   |                  |
| None       | 29,214                              | 3,232            | 14,776          | 1,442            | 14,438            | 1,790            |
| 1 CE form  | 8,532                               | 705              | 3,487           | 305              | 5,045             | 400              |
| 2 CE forms | 2,369                               | 198              | 569             | 60               | 1,800             | 138              |
| 3 CE forms | 535                                 | 46               | 101             | 10               | 434               | 36               |
| 4 CE forms | 120                                 | 13               | 18              | 3                | 102               | 10               |
| 5 CE forms | 15                                  | 3                | -               | 1                | 15                | 2                |
| 6 CE forms | 2                                   | 1                | -               | -                | 2                 | 1                |
| Total      | 40,787                              | 4,198            | 18,951          | 1,821            | 21,836            | 2,377            |

CE, cultural engagement.

**eTable 3.** Risk of cognitive impairment according to the numbers of cultural engagement forms at baseline

| Cultural Engagement                                  | Model 1          |                  |                   | Model 2          |                  |                   |
|------------------------------------------------------|------------------|------------------|-------------------|------------------|------------------|-------------------|
|                                                      | All (n=44,985)   | Male (n=20,772)  | Female (n=24,213) | All (n=44,985)   | Male (n=20,772)  | Female (n=24,213) |
| <b>Hazard Ratio for Cognitive Impairment (95%CI)</b> |                  |                  |                   |                  |                  |                   |
| None                                                 | 1.00             | 1.00             | 1.00              | 1.00             | 1.00             | 1.00              |
| Low (1)                                              | 0.84 (0.78-0.91) | 0.95 (0.84–1.07) | 0.80 (0.72–0.90)  | 0.86 (0.79–0.93) | 0.97 (0.86–1.09) | 0.82 (0.74–0.90)  |
| Middle to High (≥2)                                  | 0.84 (0.74-0.96) | 0.98 (0.77–1.22) | 0.81 (0.69–0.94)  | 0.88 (0.77–1.00) | 1.01 (0.80–1.29) | 0.84 (0.72–0.98)  |

CI, confidence interval.
